# Supplementary material
Source: MDPI journal article supplement (https://www.mdpi.com/2036-7449/16/2/23)
Supplement: s1 [file s1]

Archive with 1 entries (1 files):
- idr-2876598-supplementary.pdf
