# Supplementary material
Source: MDPI journal article supplement (https://www.mdpi.com/2036-7449/16/2/23)
Supplement: s1 [file s1 › idr-2876598-supplementary.pdf]

# A One Health Platform for Future Epidemic Preparedness

Francesco Branda <sup>1,\*</sup>, Fabio Scarpa <sup>2</sup>, Nicola Petrosillo <sup>3,\*</sup> and Massimo Ciccozzi <sup>1</sup>

<sup>1</sup> Unit of Medical Statistics and Molecular Epidemiology, Università Campus Bio-Medico di Roma, 00128 Rome, Italy; m.ciccozzi@unicampus.it

<sup>2</sup> Department of Biomedical Sciences, University of Sassari, Viale San Pietro 43b, 07100 Sassari, Italy; fscarpa@uniss.it

<sup>3</sup> Infection Prevention & Control/Infectious Disease Service, Fondazione Policlinico Universitario CampusBio-Medico, 00127 Rome, Italy

\* Correspondence: f.branda@unicampus.it (F.B.); n.petrosillo@unicampus.it (N.P.)

## Short Biography of Author of the Platform

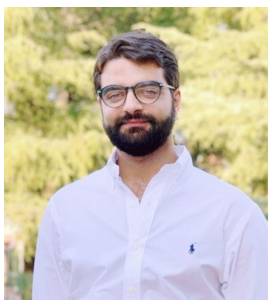

**Francesco Branda** is an Adjunct professor at the Faculty of Medicine and Surgery at Campus Bio-Medico University of Rome (UCBM). His research interests range from medical statistics to molecular epidemiology, with a focus on climate-sensitive diseases such as Dengue and Chikungunya. He is also known for his work in epidemic and pandemic analysis, including SARS-CoV-2, Mpox, and Ebola. As the founder of the ECIP platform, he is primarily responsible for organizing the data and structuring the platform. His main role includes overseeing the acquisition and integration of epidemiological data, as well as developing protocols and standards to ensure the quality and accuracy of the information on ECIP. It also plays a key role in promoting open access to data and facilitating collaboration between platform users and the scientific community to promote epidemiological research and improve public health emergency preparedness and response.

## Short Biography of Principal Contributors of the Platform

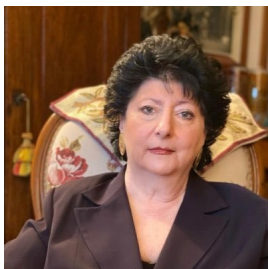

**Sandra Mazzoli** is a microbiologist, virologist and specialist in sexually transmitted diseases (STDs). Since 1990, she has been head of the Center for Sexually Transmitted Diseases at the Santa Maria Annunziata Hospital, Azienda Sanitaria of Florence, Italy. She has done a wide range of research and published numerous scientific articles on topics such as mutagenesis, STDs infections, mucosal immunology, biofilms, epidemiology, and particularly on virus infections such as HIV, herpes and HPV. His career has been characterized by an unwavering commitment to research and education in the field of microbiology and virology, with a special focus on sexually transmitted diseases and their prevention and management.

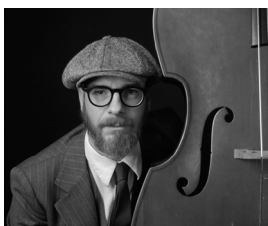

**Massimo Pierini** is a data scientist with expertise in statistics. Together with Sandra Mazzoli, he co-founded [EpiData.it](https://epidata.it), focusing on research and application of data science in various contexts, with a focus on infectious diseases such as Mpox and COVID-19.

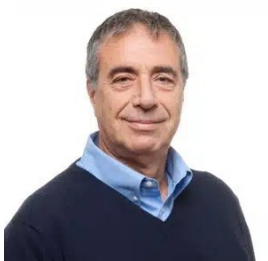

**Massimo Ciccozzi** is a Full Professor of Epidemiology and Head of Medical Statistics and Epidemiology Unit at the Faculty of Medicine and Surgery at Campus Bio-Medico University of Rome (UCBM). He has done pioneering research in viral genomics, focusing primarily on HIV, hepatitis C and other emerging viruses. He is known for his work on viral evolution and transmission of infections, using phylogenetic analysis and computational models to better understand the spread and adaptation of viruses. His scientific efforts and leadership in combating infectious diseases have contributed significantly to the understanding and management of viral epidemics. He has received several honors and awards for his work, confirming his status as one of the leading experts in his field.

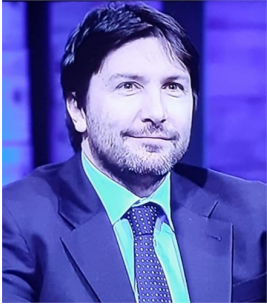

**Antonello Maruotti** is a Full Professor in Statistics at the Libera Università Maria SS. Assunta (LUMSA) in Rome, Italy. His expertise extends to statistical modeling techniques, including hidden Markov models, mixture models, longitudinal data analysis, and spatiotemporal modeling. He has also contributed to the understanding of the impact of COVID-19 through his research on excess mortality, virus variants and prediction of disease incidence.

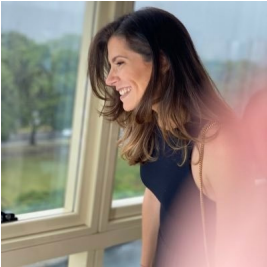

**Marta Giovanetti** is a researcher in the field of molecular epidemiology and virus evolution. During her career, she has worked in several research institutes and hospitals in Brazil, Sierra Leone and Egypt, holding positions as a researcher and visiting professor. Her research focuses on virus genomics, with an emphasis on infectious disease epidemics such as HIV, Ebola, Zika, Dengue and COVID-19. She has contributed to numerous studies published in international scientific journals, providing important insights into the origin, evolution and spread of pathogenic viruses.

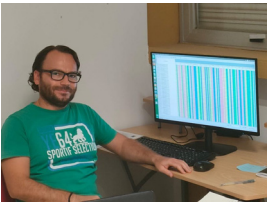

**Fabio Scarpa** is a researcher and molecular biologist at the University of Sassari. His work revolves around genomic epidemiology, viral evolution, and infectious disease dynamics. In recent years, his research has shed light on different aspects of viral pathogens, from the genetic variability of SARS-CoV-2 variants to the evolutionary history of viruses such as Orf virus and Marburg virus. Throughout his career, he has demonstrated a remarkable ability to integrate advanced genomic techniques with epidemiological data, providing valuable insights into the occurrence and spread of infectious diseases. His work has been instrumental in informing public health strategies and interventions to control epidemics.
